# Supplementary material for: Development of the Caecal Microbiota in Three Broiler Breeds
Source: PubMed Central journal article supplement (PMC6603203; doi:10.3389/fvets.2019.00201), 2019-06-25

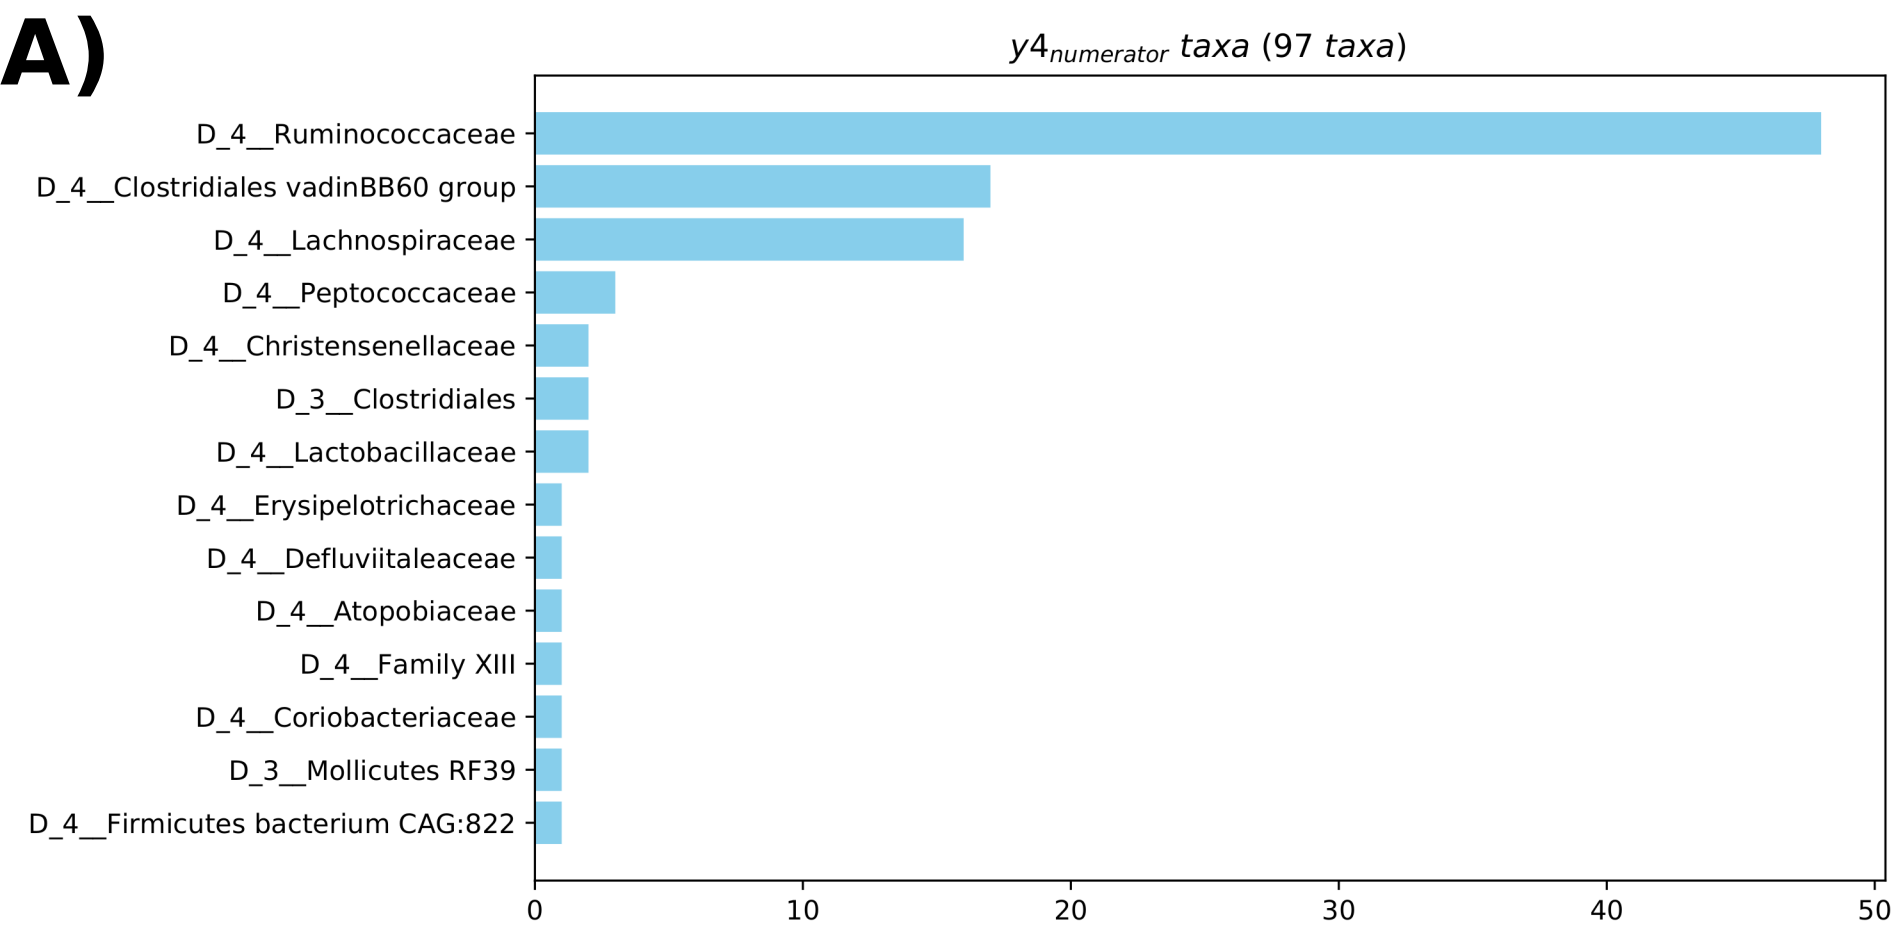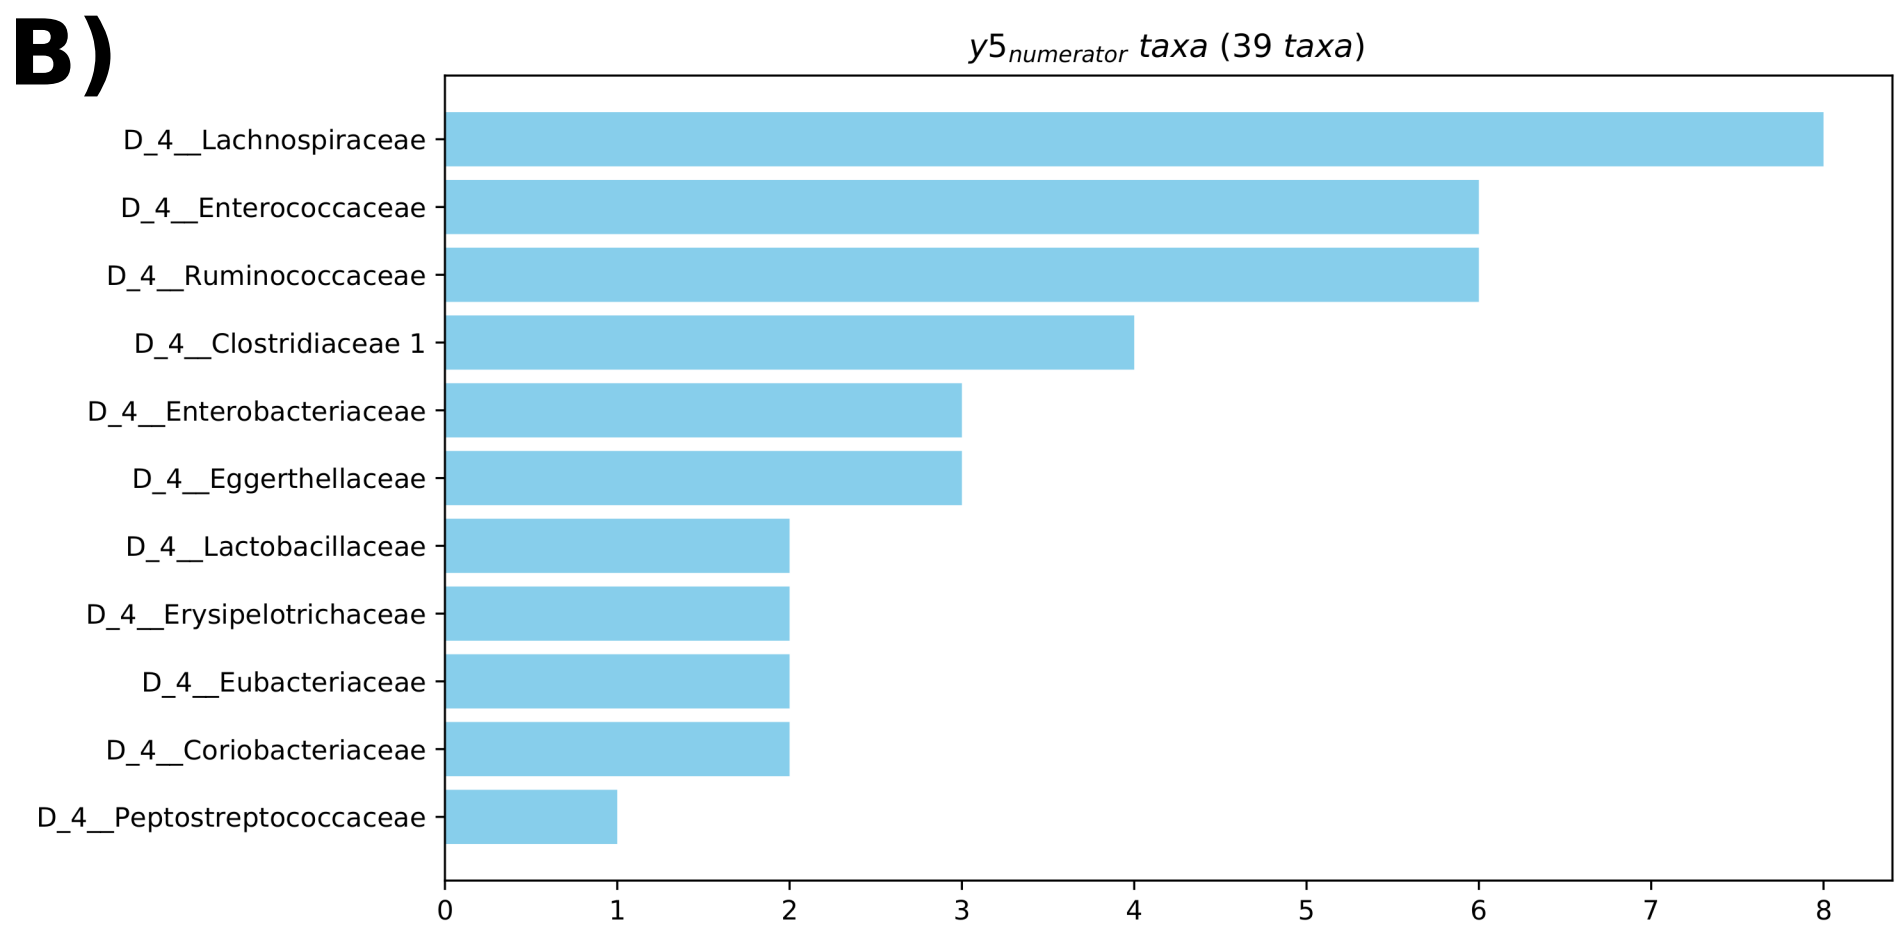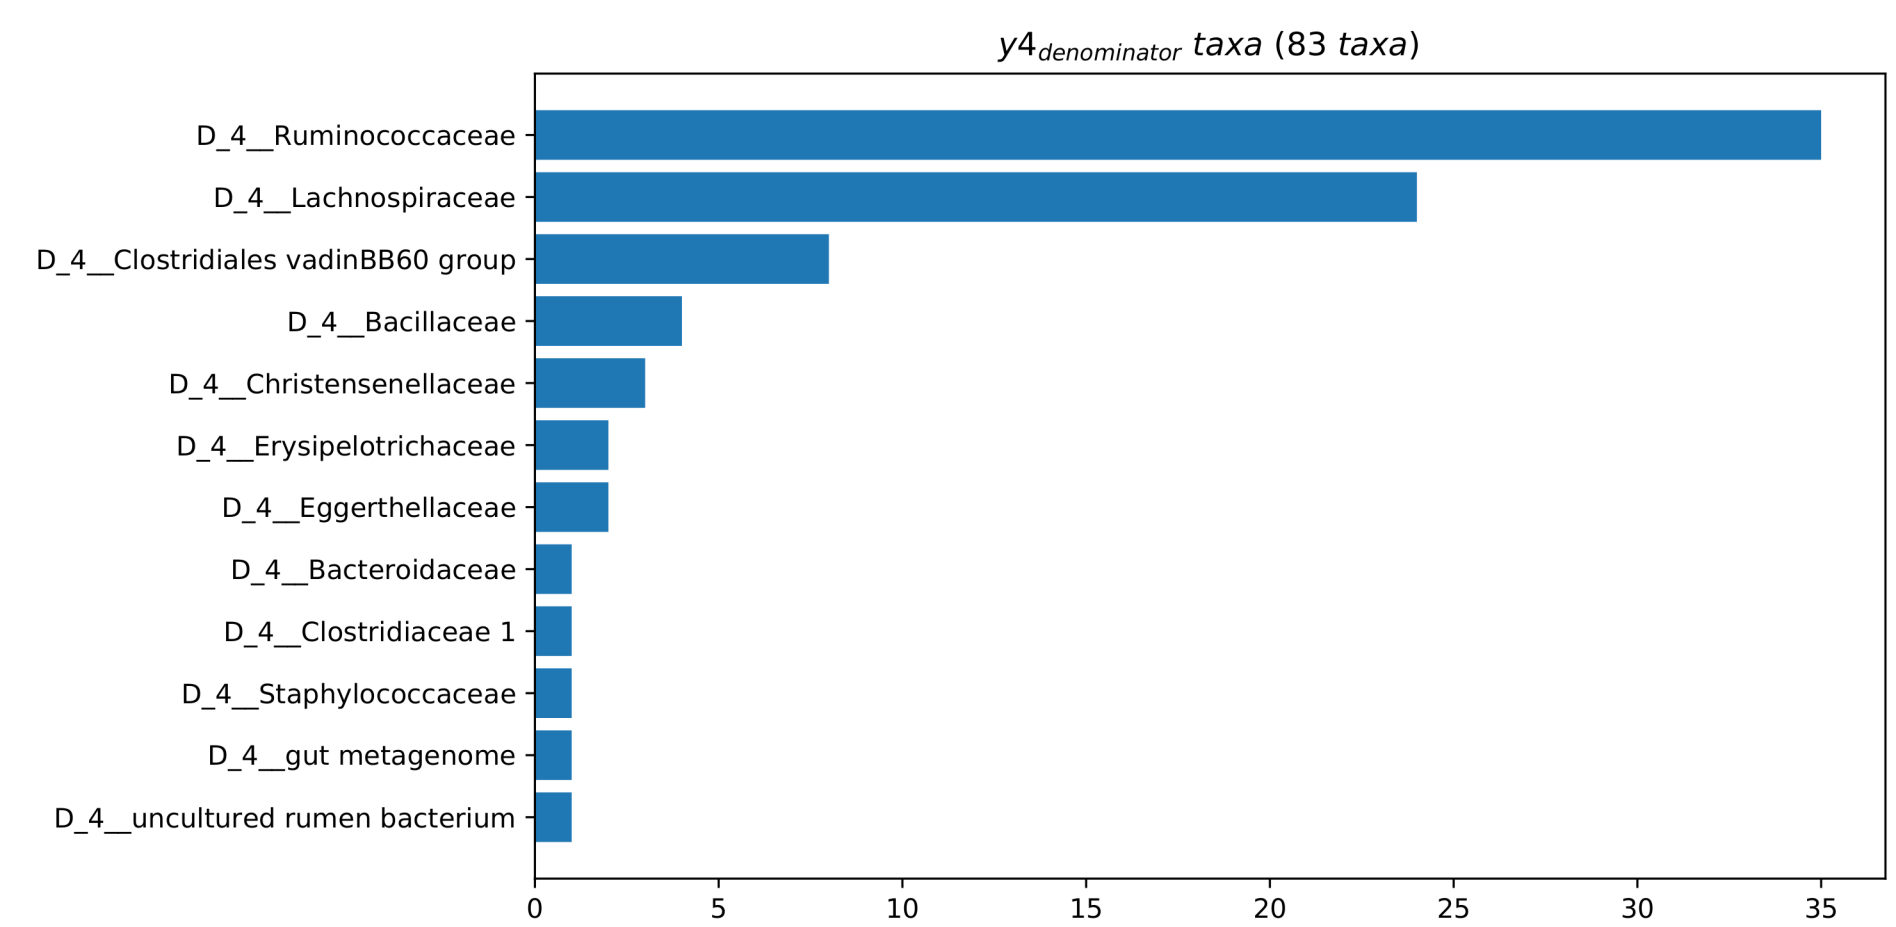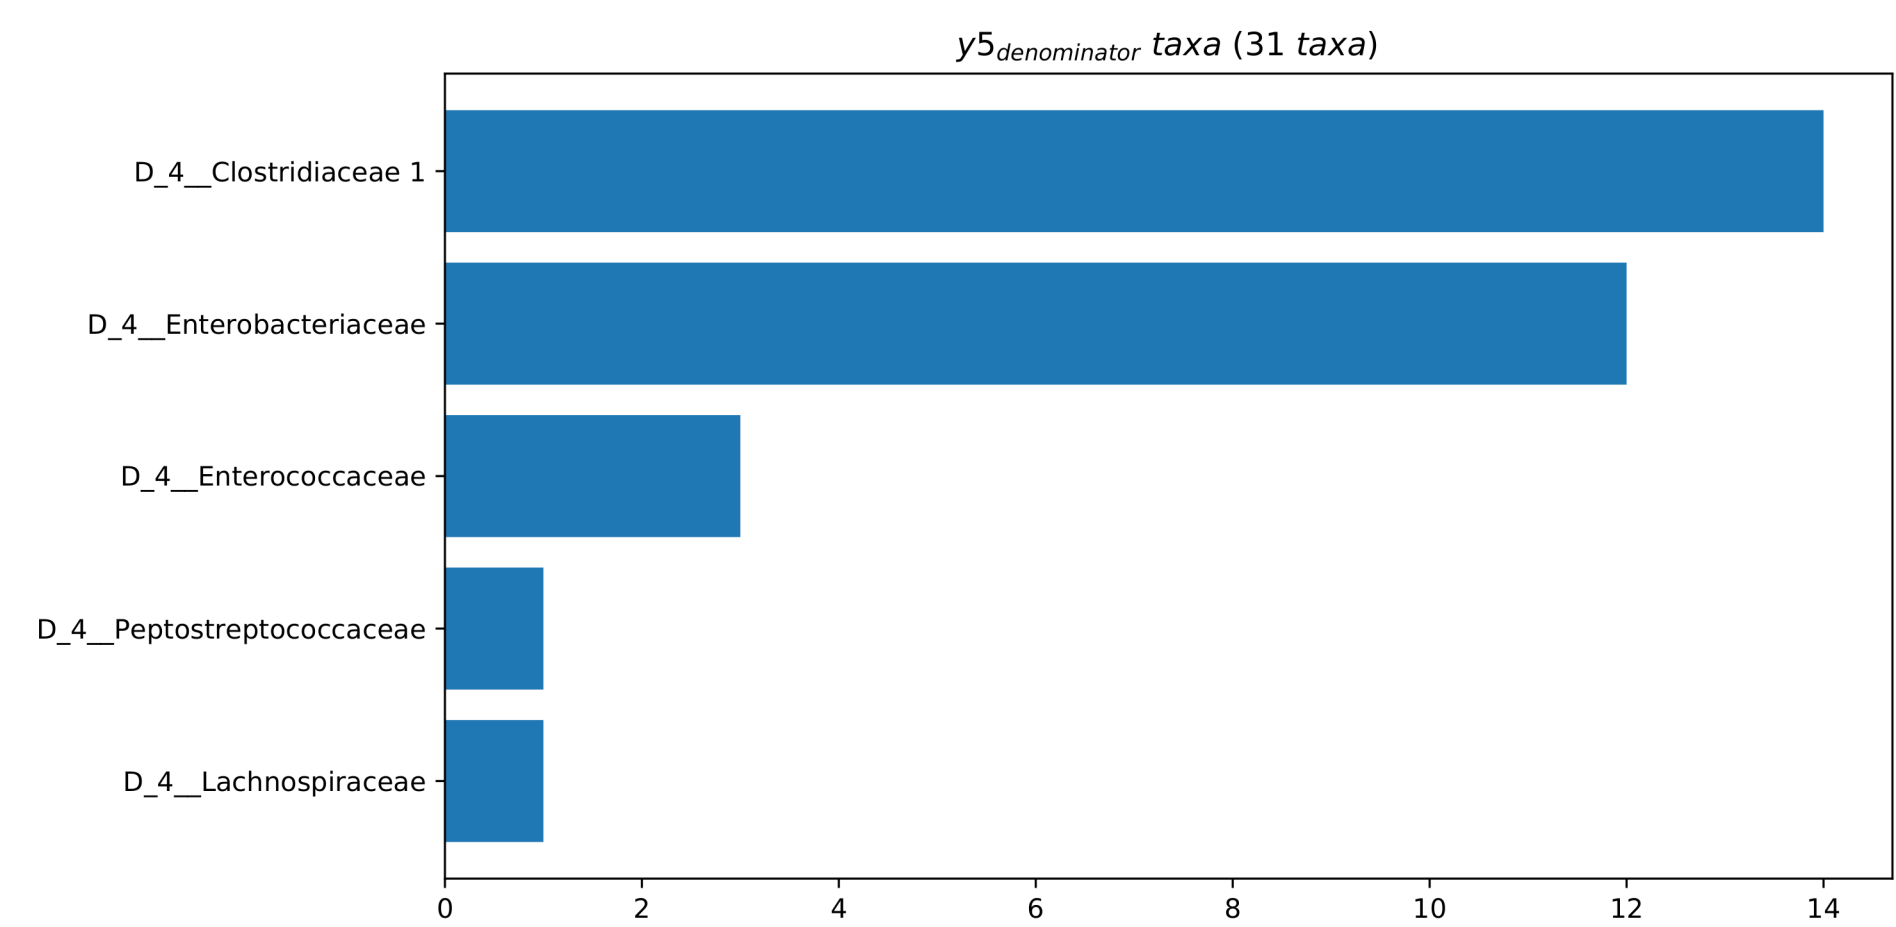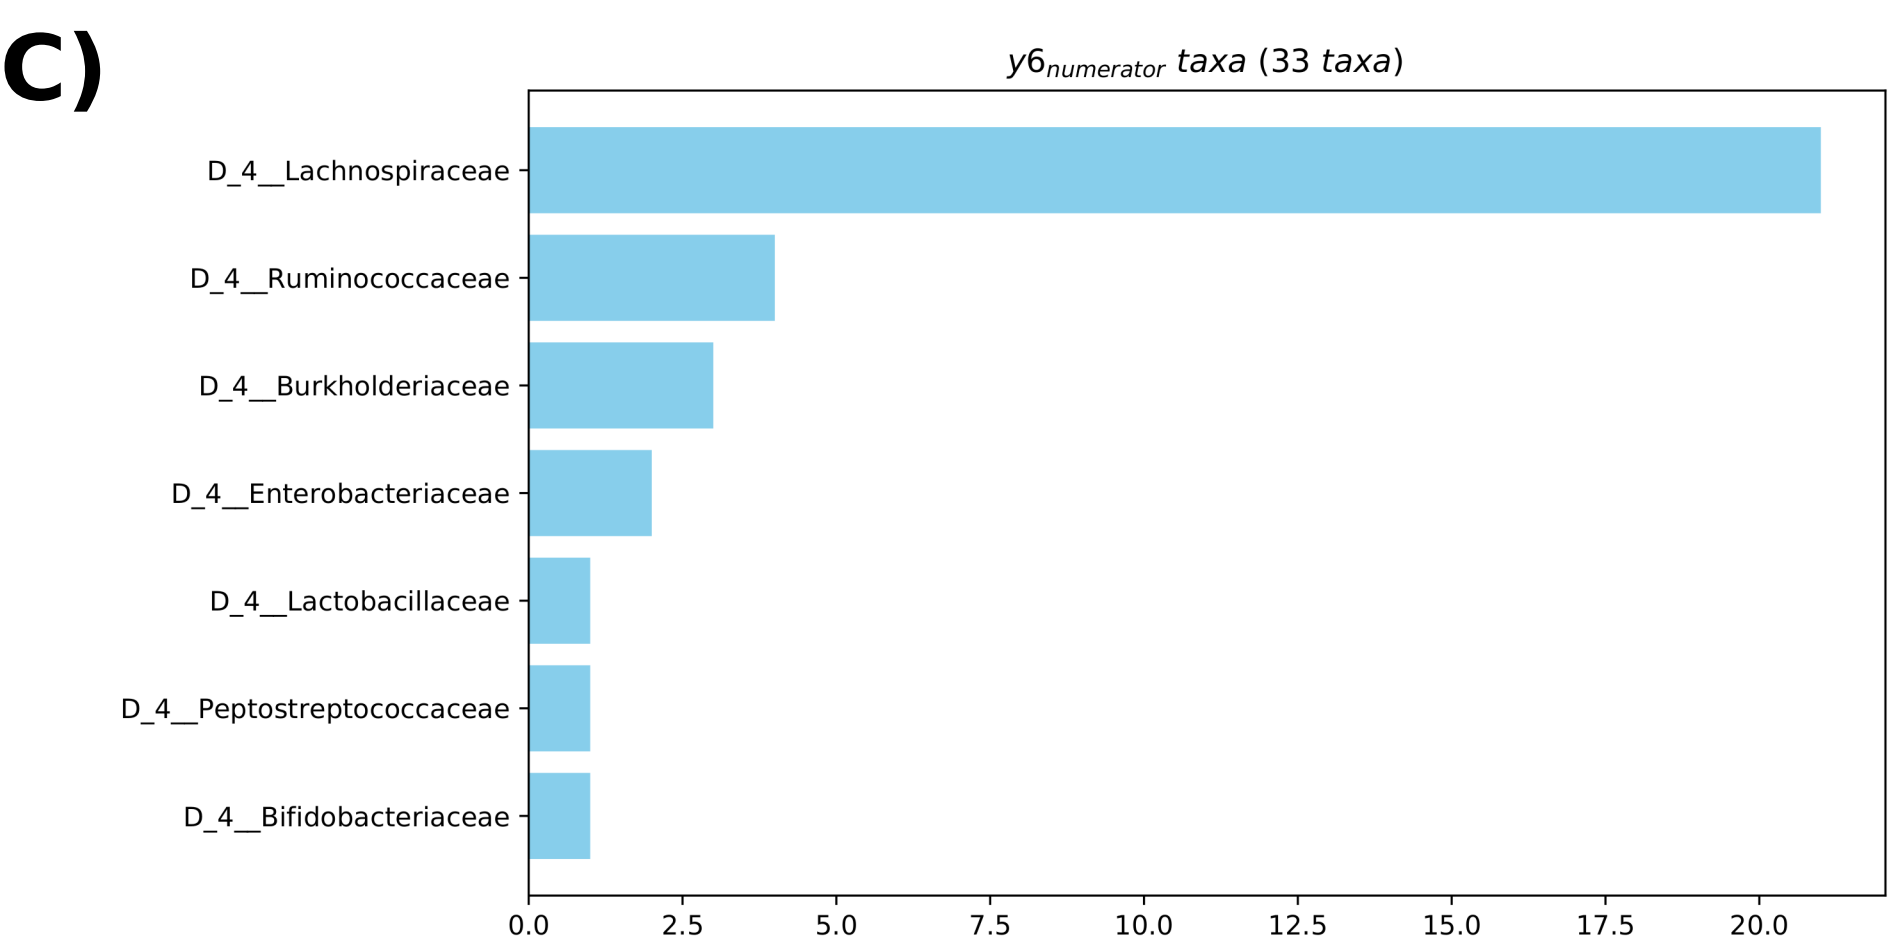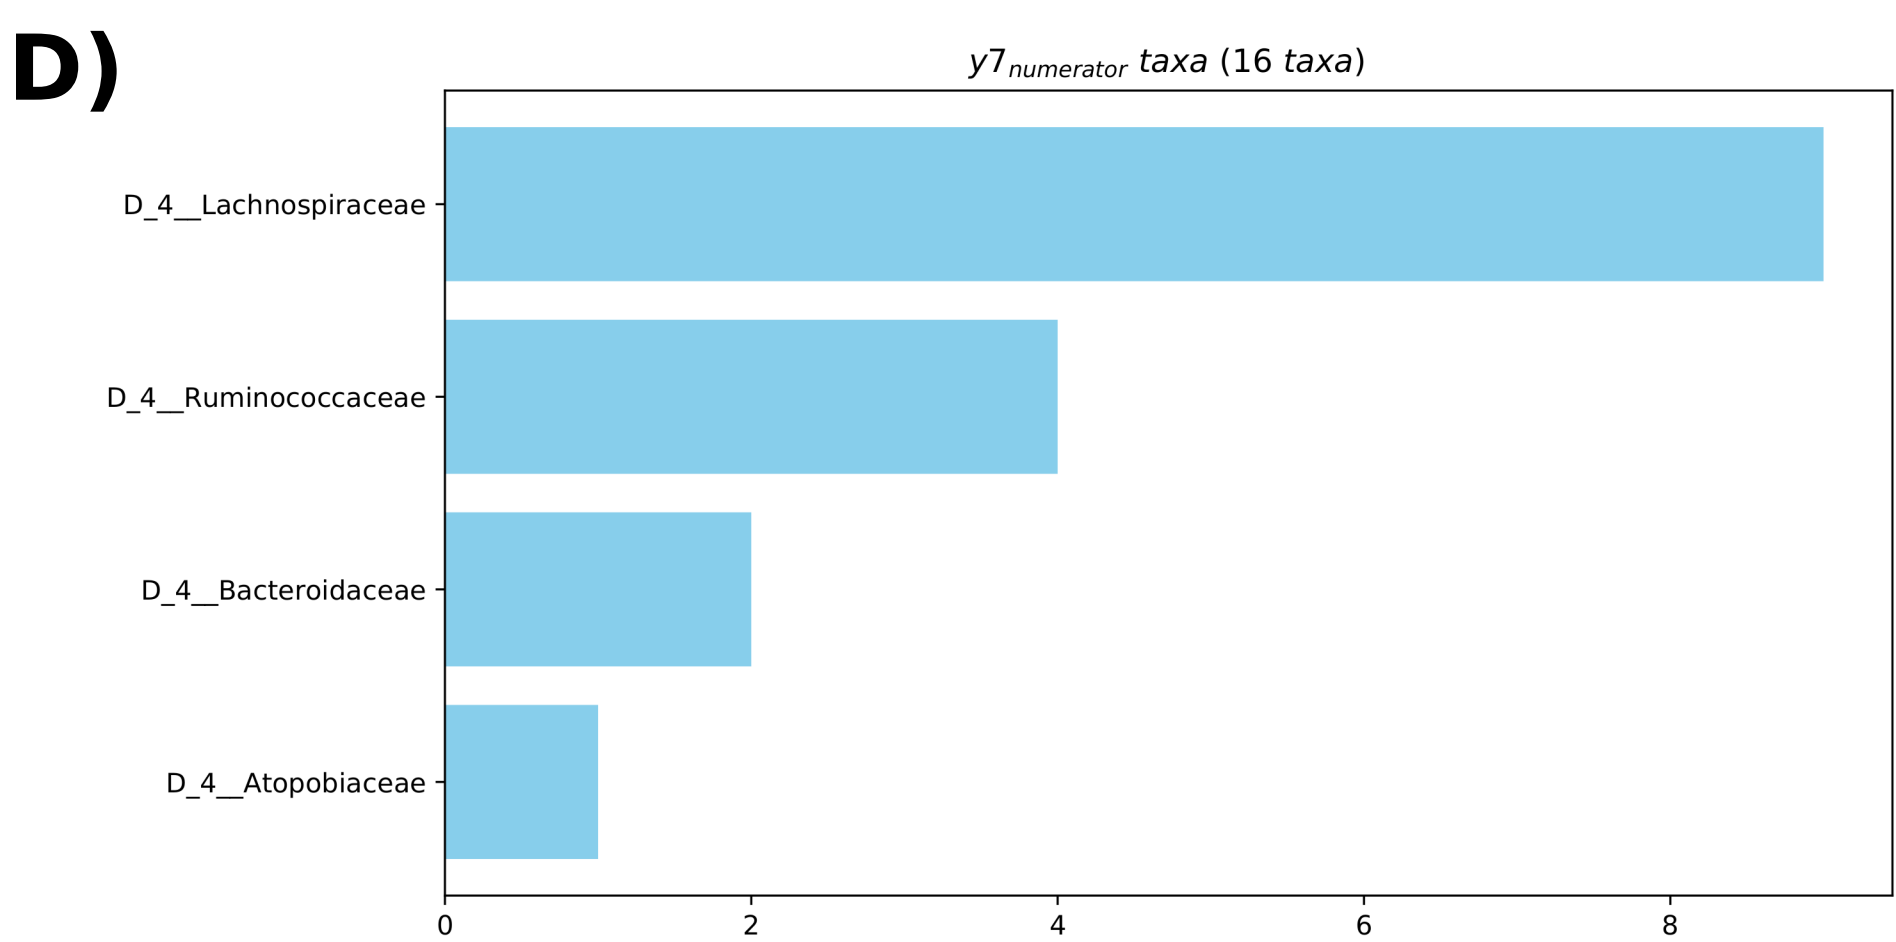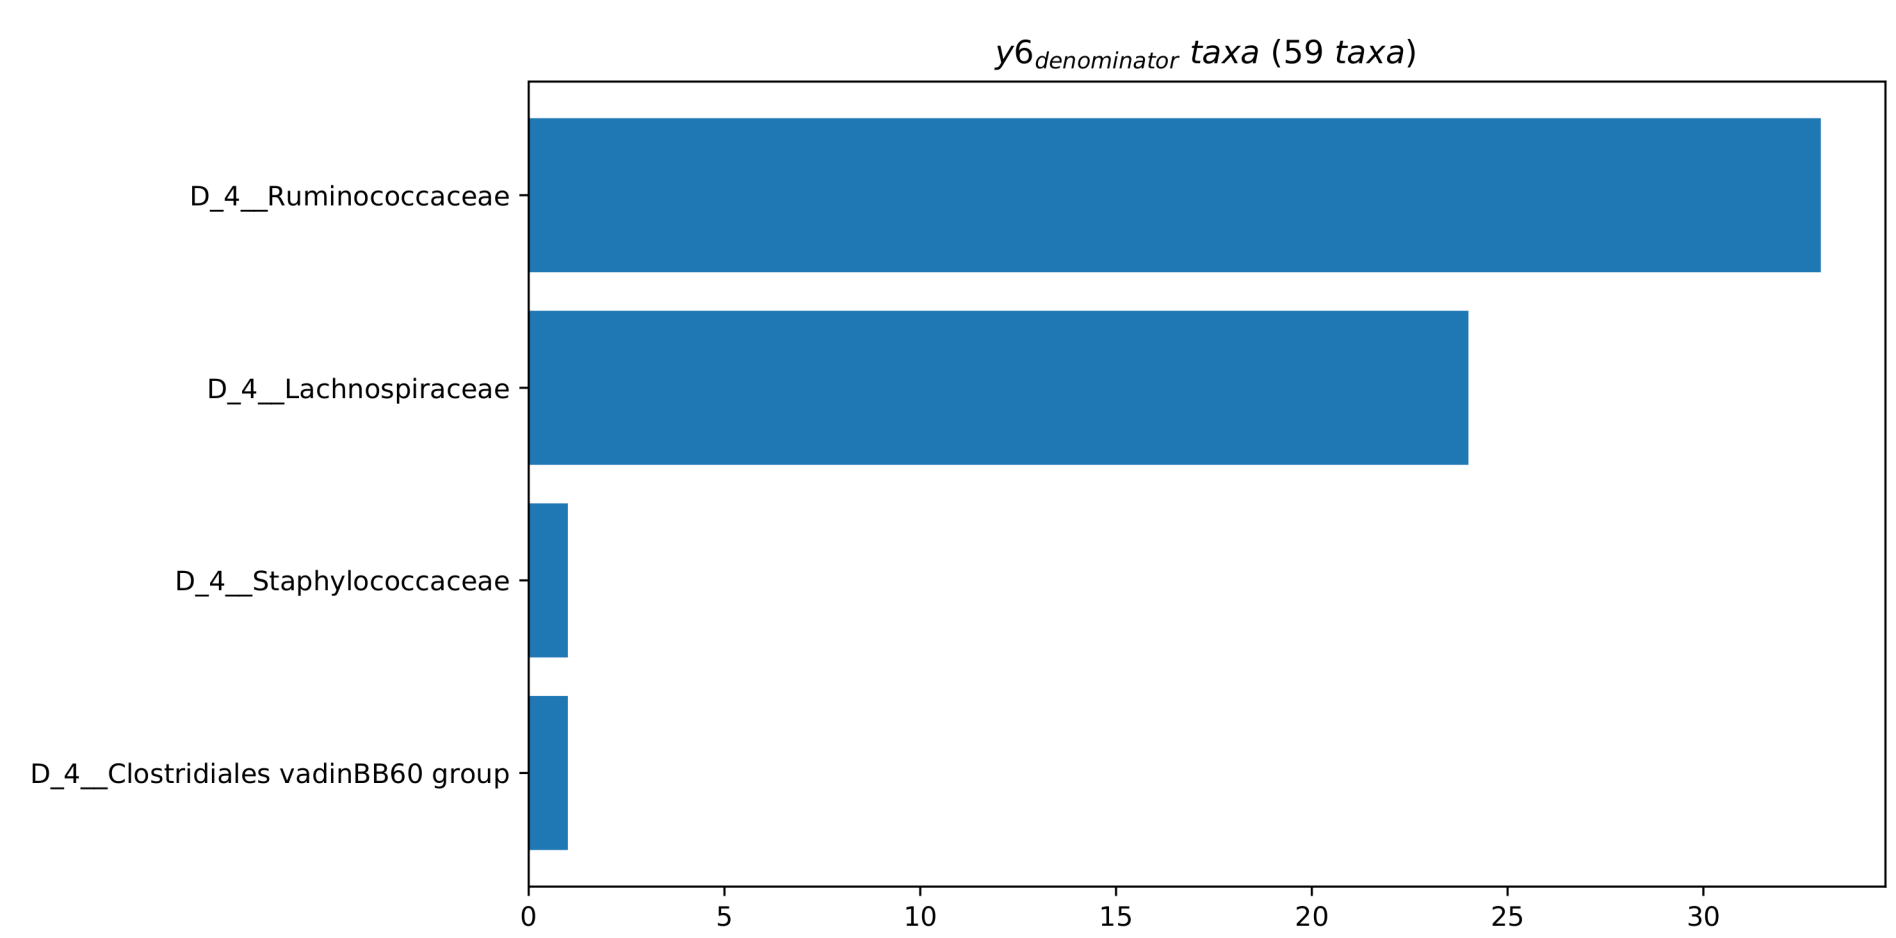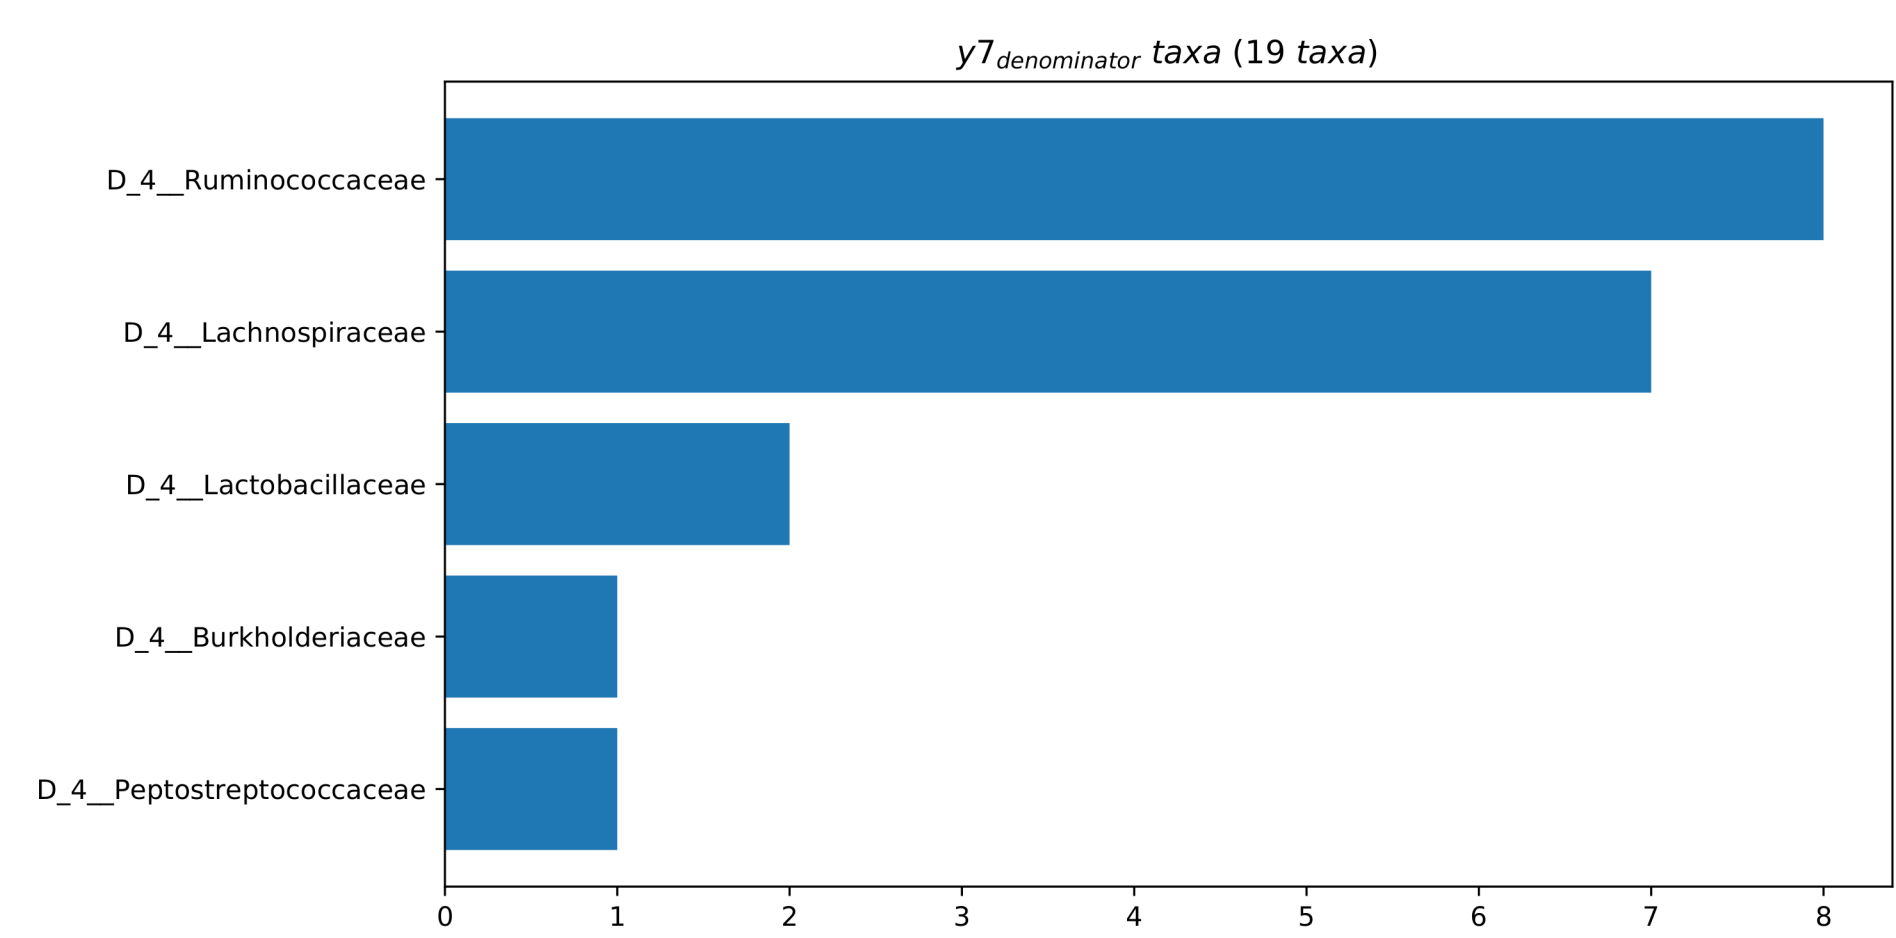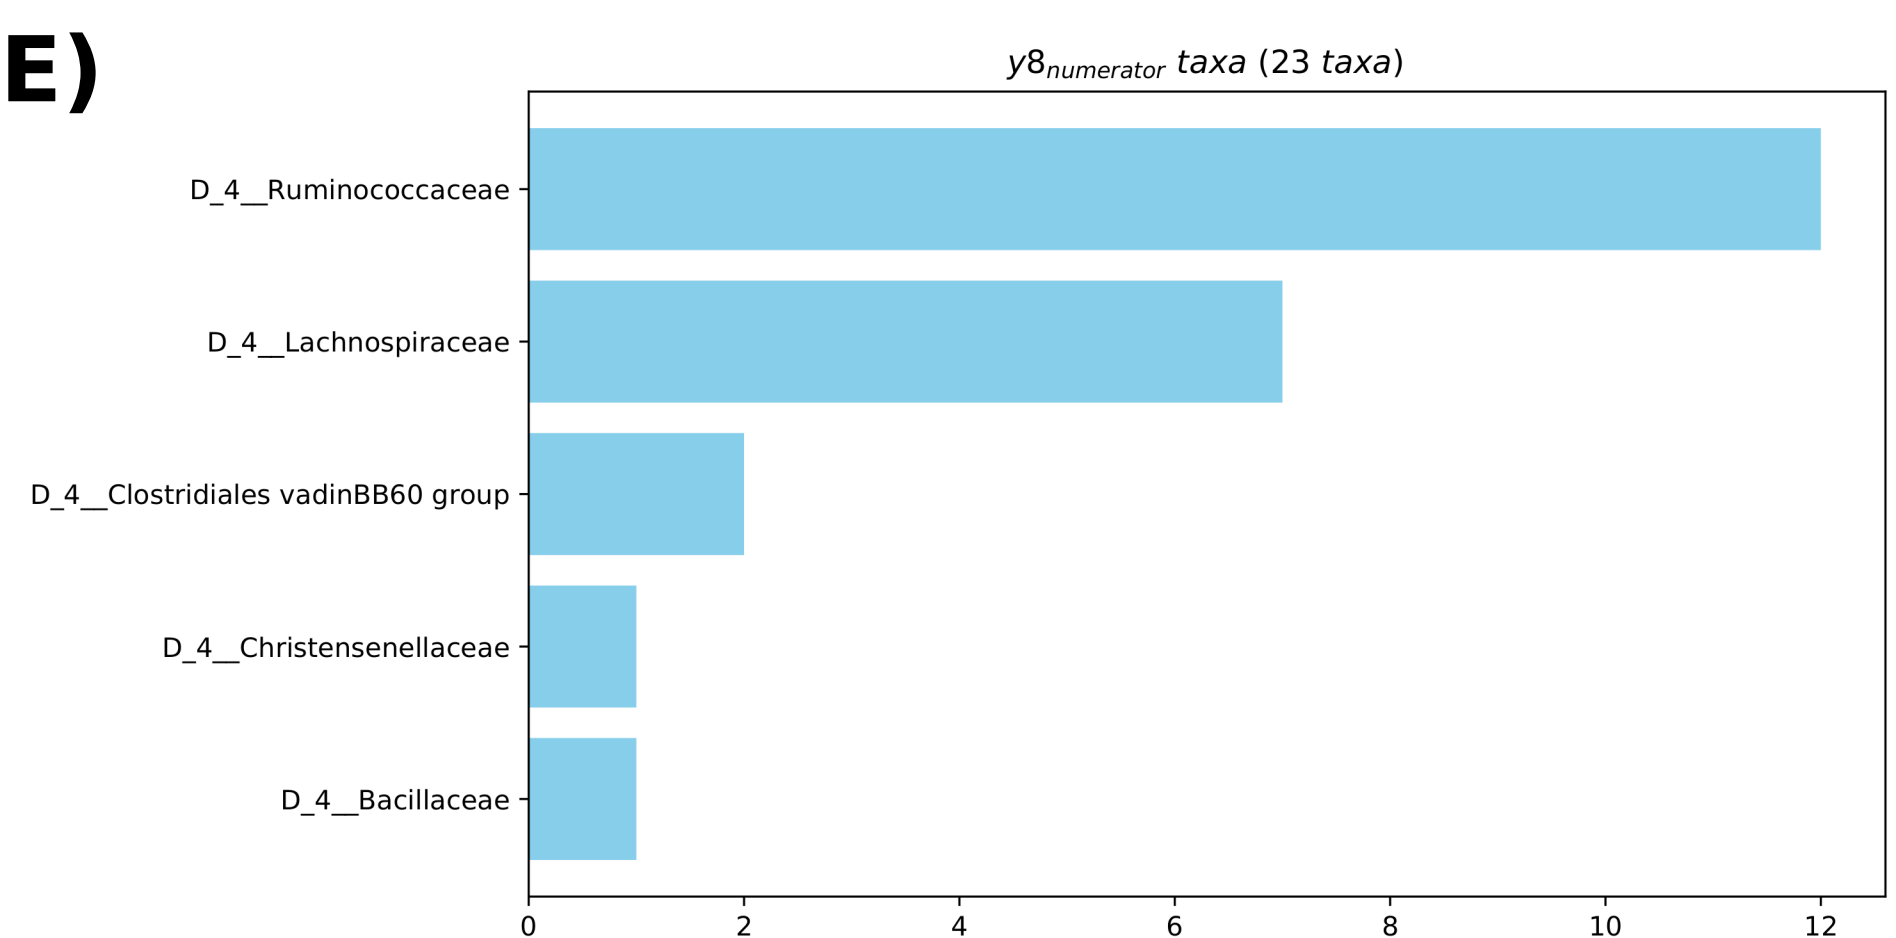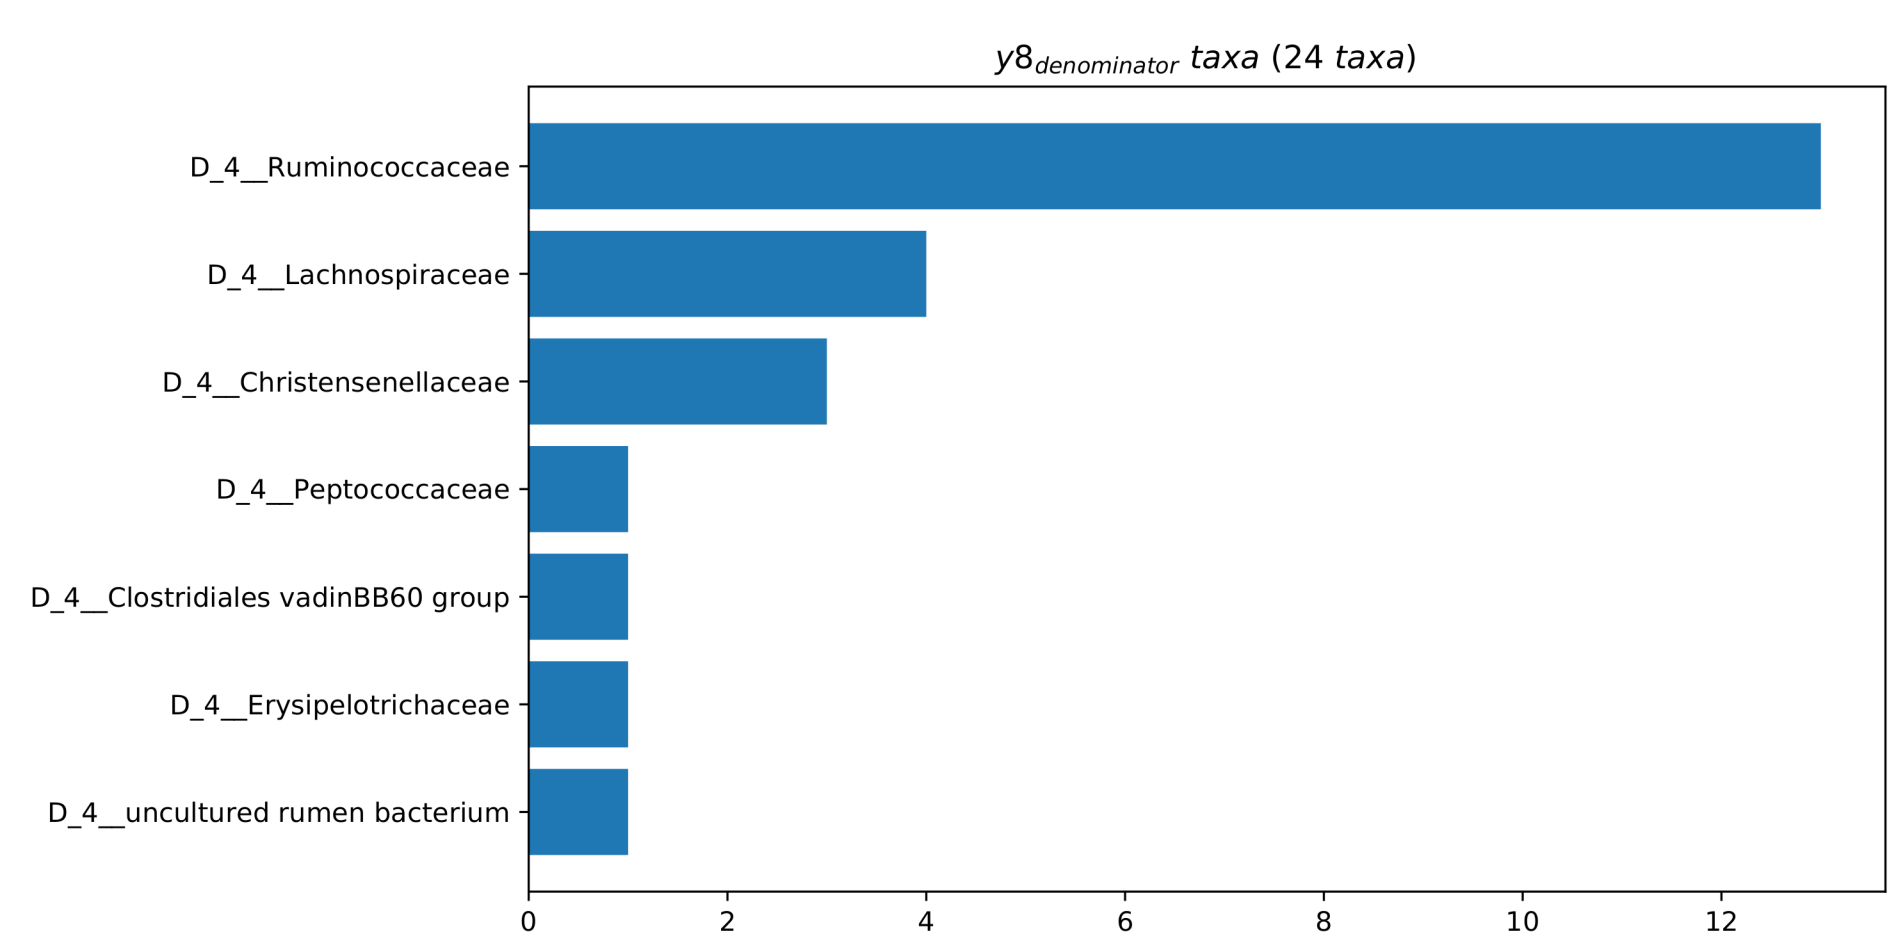

Supplement: Image_1.pdf [file Image_1.pdf]
