# Supplementary material for: Development of the Caecal Microbiota in Three Broiler Breeds
Source: PubMed Central journal article supplement (PMC6603203; doi:10.3389/fvets.2019.00201), 2019-06-25

$y2_{numerator}$  taxa (193 taxa)

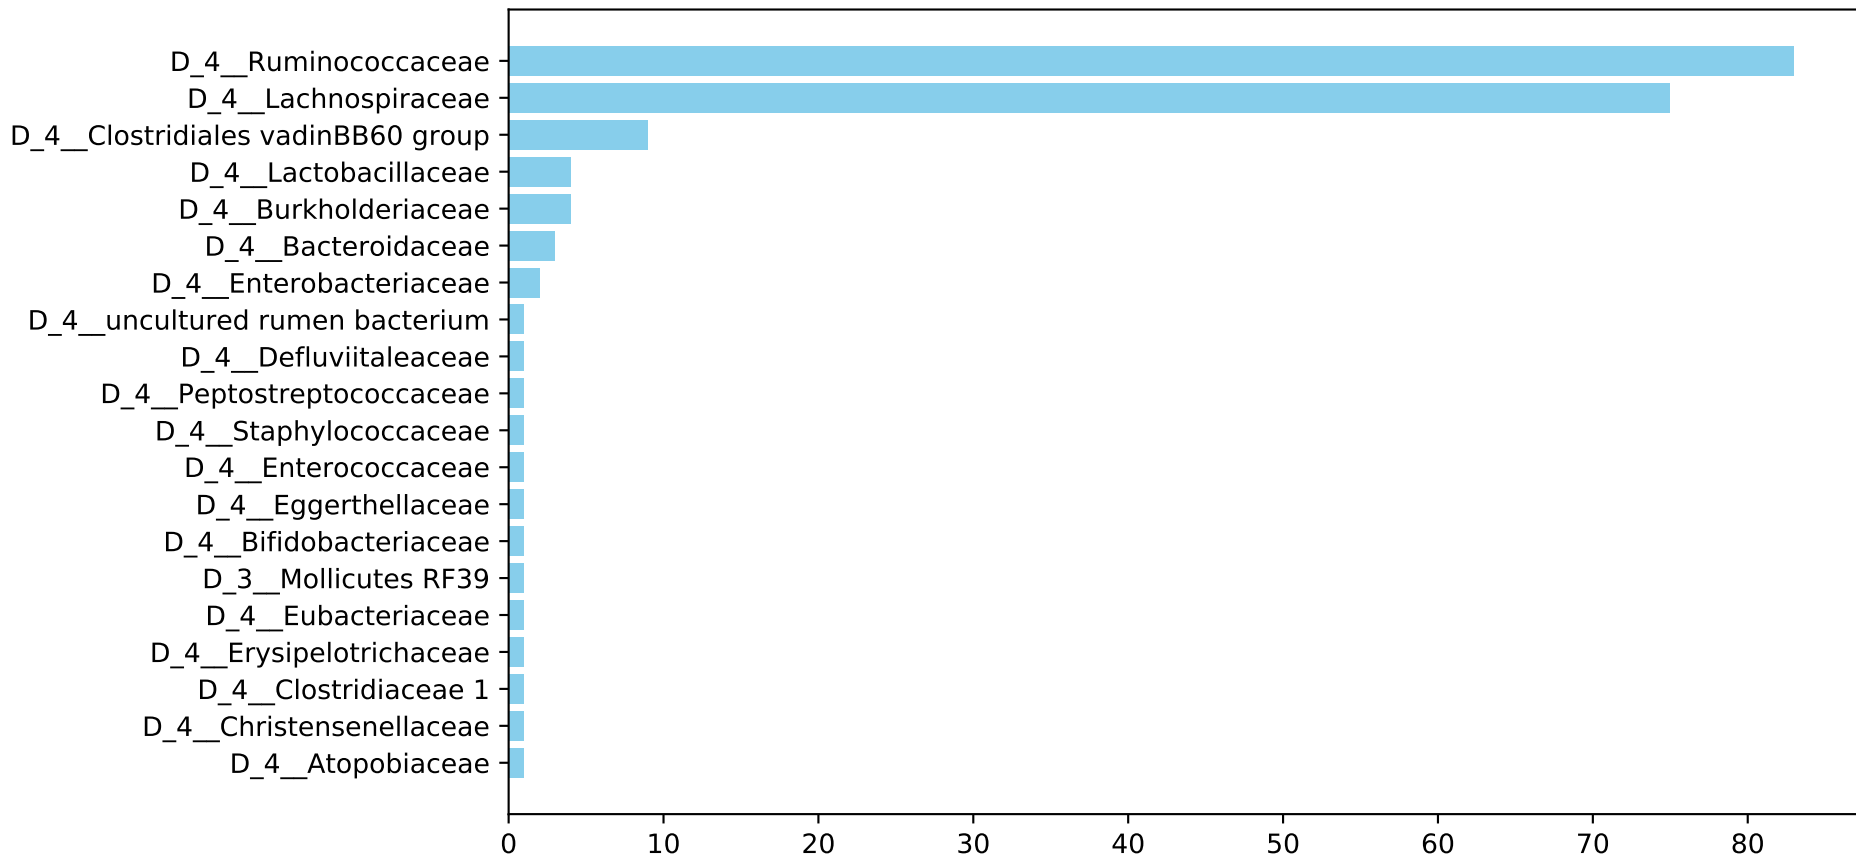

$y2_{denominator}$  taxa (62 taxa)

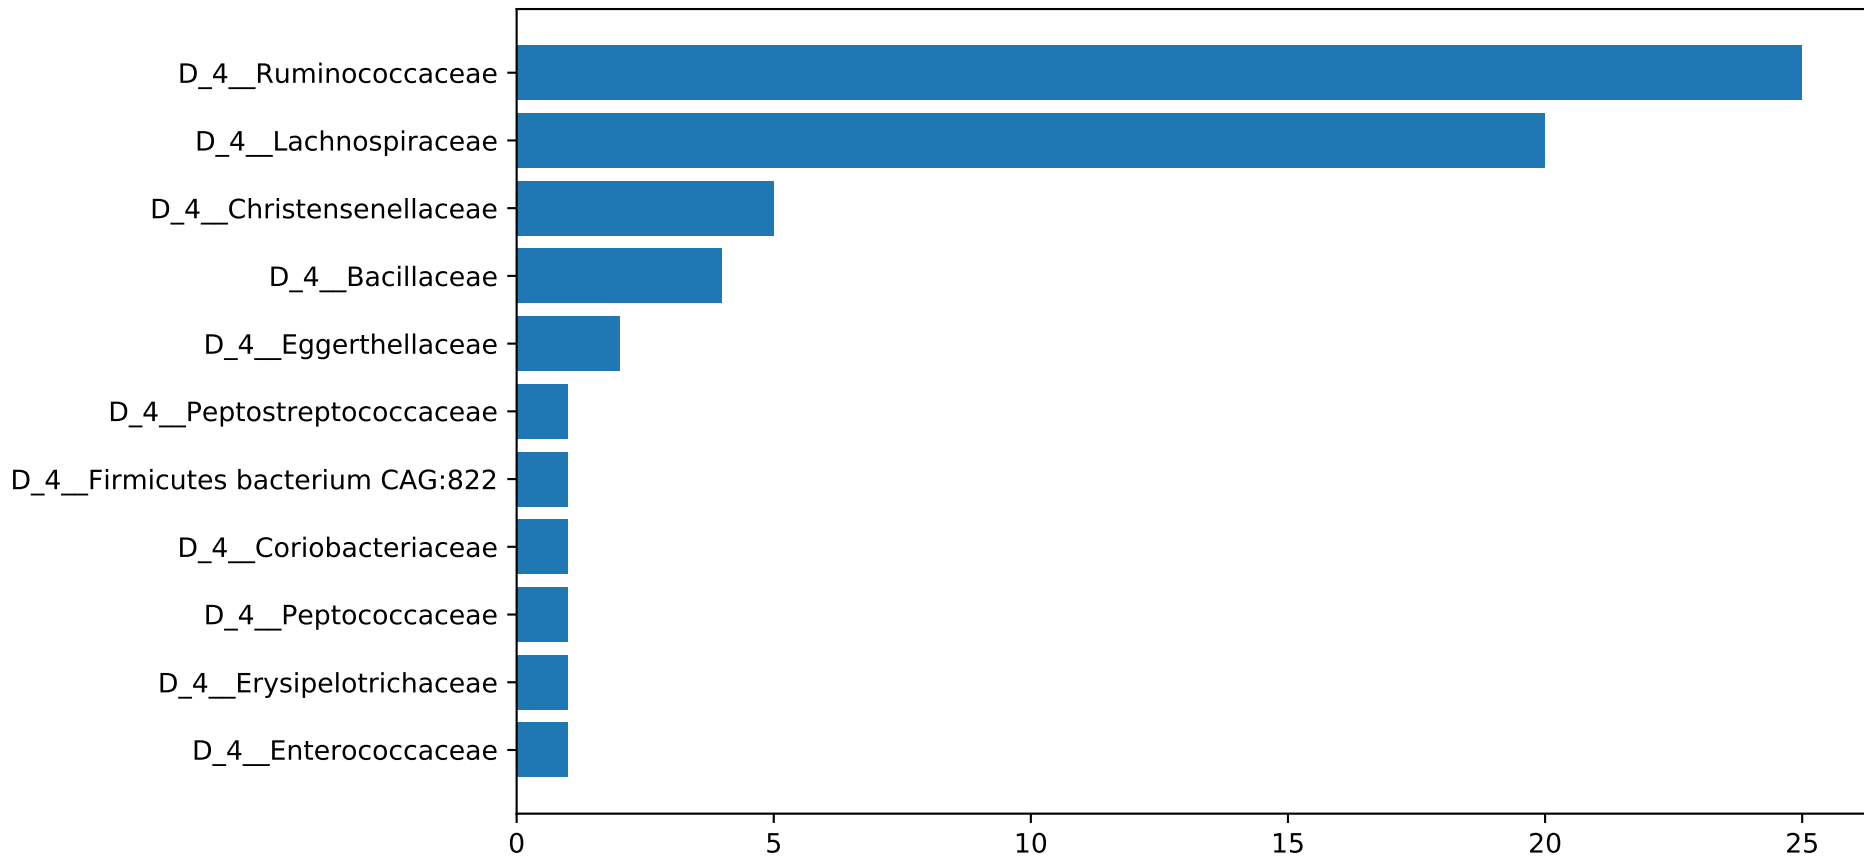

Supplement: Image_2.pdf [file Image_2.pdf]
